# An open library of human kinase domain constructs for automated bacterial expression

Steven K. Albanese<sup>1,2†</sup>, Daniel L. Parton<sup>2†</sup>, Mehtap Işık<sup>2,3‡</sup>, Lucelenie Rodríguez-Laureano<sup>2‡</sup>, Sonya M. Hanson<sup>2</sup>, Julie M. Behr<sup>2,7</sup>, Scott Gradia<sup>4§</sup>, Chris Jeans<sup>4</sup>, Nicholas M. Levinson<sup>6</sup>, Markus A. Seeliger<sup>5</sup>, John D. Chodera<sup>\*2</sup>

<sup>1</sup>Gerstner Sloan Kettering Graduate School, Memorial Sloan Kettering Cancer Center, New York, NY 10065; <sup>2</sup>Computational and Systems Biology Program, Sloan Kettering Institute, Memorial Sloan Kettering Cancer Center, New York, NY 10065; <sup>3</sup>Tri-Institutional PhD Program in Chemical Biology, Weill Cornell Graduate School of Medical Sciences, Cornell University, New York, NY 10065; <sup>4</sup>QB3 MacroLab, University of California, Berkeley, CA 94720; <sup>5</sup>Department of Pharmacological Sciences, Stony Brook University Medical School, Stony Brook, NY 11794; <sup>6</sup>Department of Pharmacology, University of Minnesota, Minneapolis, MN 55455; <sup>7</sup>Tri-Institutional Program in Computation Biology and Medicine, Weill Cornell Graduate School of Medical Sciences, Cornell University, New York, NY 10065

**Abstract** Kinases play a critical role in many cellular signaling pathways and are dysregulated in a number of diseases, such as cancer, diabetes, and neurodegeneration. Since the FDA approval of imatinib in 2001, therapeutics targeting kinases now account for roughly 50% of current cancer drug discovery efforts. The ability to explore human kinase biochemistry, biophysics, and structural biology in the laboratory is essential to making rapid progress in understanding kinase regulation, designing selective inhibitors, and studying the emergence of drug resistance. While insect and mammalian expression systems are frequently used for the expression of human kinases, bacterial expression systems are superior in terms of simplicity and cost-effectiveness but have historically struggled with human kinase expression. Following the discovery that phosphatase coexpression could produce high yields of Src and Abl kinase domains in bacterial expression systems, we have generated a library of 52 His-tagged human kinase domain constructs that express above 2  $\mu\text{g}/\text{mL}$  culture in a simple automated bacterial expression system utilizing phosphatase coexpression (YopH for Tyr kinases, Lambda for Ser/Thr kinases). Here, we report a structural bioinformatics approach to identify kinase domain constructs previously expressed in bacteria likely to express well in a simple high-throughput protocol, experiments demonstrating our simple construct selection strategy selects constructs with good expression yields in a test of 84 potential kinase domain boundaries for Abl, and yields from a high-throughput expression screen of 96 human kinase constructs. Using a fluorescence-based thermostability assay and a fluorescent ATP-competitive inhibitor, we show that the highest-expressing kinases are folded and have well-formed ATP binding sites. We also demonstrate how the resulting expressing constructs can be used for the biophysical and biochemical study of clinical mutations by engineering a panel of 48 Src mutations and 46 Abl mutations via single-primer mutagenesis and screening the resulting library for expression yields. The wild-type kinase construct library is available publicly via Addgene, and should prove to be of high utility for experiments focused on drug discovery and the emergence of drug resistance.

## 40 Introduction

41 Kinases play a critical role in cellular signaling pathways, controlling a number of key biological processes  
42 that include growth and proliferation. There are over 500 kinases in the human genome<sup>1,2</sup>, many of which  
43 are of therapeutic interest. Perturbations due to mutation, translocation, or upregulation can cause one or  
44 more kinases to become dysregulated, often with disastrous consequences<sup>3</sup>. Kinase dysregulation has been  
45 linked to a number of diseases, such as cancer, diabetes, and inflammation. Cancer alone is the second  
46 leading cause of death in the United States, accounting for nearly 25% of all deaths; in 2015, over 1.7 million  
47 new cases were diagnosed, with over 580,000 deaths<sup>4</sup>. Nearly 50% of cancer drug development is targeted  
48 at kinases, accounting for perhaps 30% of *all* drug development effort globally<sup>5,6</sup>.

49 The discovery of imatinib, an inhibitor that targets the Abelson tyrosine kinase (Abl) dysregulated in  
50 chronic myelogenous leukemia (CML) patients, was transformative in revealing the enormous therapeutic  
51 potential of selective kinase inhibitors, kindling hope that this remarkable success could be recapitulated for  
52 other cancers and diseases<sup>7</sup>. While there are now 39 FDA-approved selective kinase small molecule inhibitors  
53 (as of 16 Jan 2018)<sup>8,9</sup>, these molecules were approved for targeting only 22 out of ~500 human kinases<sup>1</sup>, with  
54 the vast majority developed to target just a handful of kinases<sup>10</sup>. The discovery of therapeutically effective  
55 inhibitors for other kinases has proven remarkably challenging.

56 While these inhibitors have found success in the clinic, many patients cease to respond to treatment  
57 due to resistance caused by mutations in the targeted kinase<sup>11</sup>, activation of downstream kinases<sup>3</sup>, or  
58 relief of feedback inhibition in signaling pathways<sup>12</sup>. These challenges have spurred the development of a  
59 new generation of inhibitors aimed at overcoming resistance<sup>13,14</sup>, as well as mutant-specific inhibitors that  
60 target kinases bearing a missense mutation that confers resistance to an earlier generation inhibitor<sup>15</sup>. The  
61 ability to easily engineer and express mutant kinase domains of interest would be of enormous aid in the  
62 development of mutant-selective inhibitors, offering an advantage over current high-throughput assays<sup>16-18</sup>,  
63 which typically include few clinically-observed mutant kinases.

64 Probing human kinase biochemistry, biophysics, and structural biology in the laboratory is essential to  
65 making rapid progress in understanding kinase regulation, developing selective inhibitors, and studying  
66 the biophysical driving forces underlying mutational mechanisms of drug resistance. While human kinase  
67 expression in baculovirus-infected insect cells can achieve high success rates<sup>19,20</sup>, it cannot compete in cost,  
68 convenience, or speed with bacterial expression. *E. coli* expression enables production of kinases without  
69 unwanted post-translational modifications, allowing for greater control of the system. A survey of 62 full-  
70 length non-receptor human kinases found that over 50% express well in *E. coli*<sup>19</sup>, but often expressing only  
71 the soluble kinase domains are sufficient, since these are the molecular targets of therapy for targeted kinase  
72 inhibitors and could be studied even for receptor-type kinases. While removal of regulatory domains can  
73 negatively impact expression and solubility, coexpression with phosphatase was shown to greatly enhance  
74 bacterial kinase expression in Src and Abl tyrosine kinases, presumably by ensuring that kinases remain in  
75 an unphosphorylated inactive form where they can cause minimal damage to cellular machinery<sup>21</sup>.

76 The protein databank (PDB) now contains over 100 human kinases that were expressed in bacteria,  
77 according to PDB header data. Many of these kinases were expressed and crystallized as part of the  
78 highly successful Structural Genomics Consortium (SGC) effort to increase structural coverage of the human  
79 kinome<sup>22</sup>. Since bacterial expression is often complicated by the need to tailor construct boundaries,  
80 solubility-promoting tags, and expression and purification protocols individually for each protein expressed,  
81 we wondered whether a simple, uniform, automatable expression and purification protocol could be used  
82 to identify tractable kinases, select construct boundaries, express a large number of human kinases and  
83 their mutant forms, and produce a convenient bacterial expression library to facilitate kinase research and  
84 selective inhibitor development. As a first step toward this goal, we developed a structural informatics  
85 pipeline to use available kinase structural data and associated metadata to select constructs from available  
86 human kinase libraries to clone into a standard set of vectors intended for phosphatase coexpression  
87 under a simple automatable expression and purification protocol. Using an expression screen for multiple  
88 construct domain boundaries of Abl, we found that transferring construct boundaries from available

<sup>1</sup>These targets are, currently: Abl, DDR1, EGFR, HER2, VEGFR1/2/3, Alk, Met, BRAF, JAK1/2/3, Btk, PI3K, CDK4, CDK6, MEK, ROS1, Flt3, IGF1R, Ret, Kit, Axl, TrkB, and mTOR<sup>9</sup>.

89 structural data can produce constructs with useful expression levels, enabling simple identification of  
 90 construct domain boundaries. We then completed an automated expression screen in Rosetta2 cells of  
 91 96 different kinases and found that 52 human kinase domains express with yields greater than 2  $\mu\text{g}/\text{mL}$   
 92 culture. To investigate whether these kinases are properly folded and useful for biophysical experiments, we  
 93 performed a fluorescence-based thermostability assay on the 14 highest expressing kinases in our panel  
 94 and a single-well high-throughput fluorescence-based binding affinity measurement on 39 kinases. These  
 95 experiments demonstrated that many of the expressed kinases were folded, with well formed ATP binding  
 96 sites capable of binding a small molecule kinase inhibitor. To demonstrate the utility of these constructs for  
 97 probing the effect of clinical mutations on kinase structure and ligand binding, we subsequently screened 48  
 98 Src and 46 Abl mutations, finding that many clinically-derived mutant kinase domains can be expressed with  
 99 useful yields in this uniform automated expression and purification protocol.

100 All source code, data, and wild-type kinase plasmids associated with this project are freely available  
 101 online:

- 102 • **Source code and data:** <https://github.com/choderalab/kinase-ecoli-expression-panel>
- 103 • **Interactive table of expression data:** <http://choderalab.org/kinome-expression>
- 104 • **Plasmids:** <https://www.addgene.org/kits/chodera-kinase-domains>

## 105 Results

### 106 Construct boundary choice impacts Abl kinase domain expression

107 To understand how alternative choices of expression construct boundaries can modulate bacterial expres-  
 108 sion of a human kinase domain, we carried out an expression screen of 84 unique construct boundaries  
 109 encompassing the kinase domain of the tyrosine protein kinase ABL1.

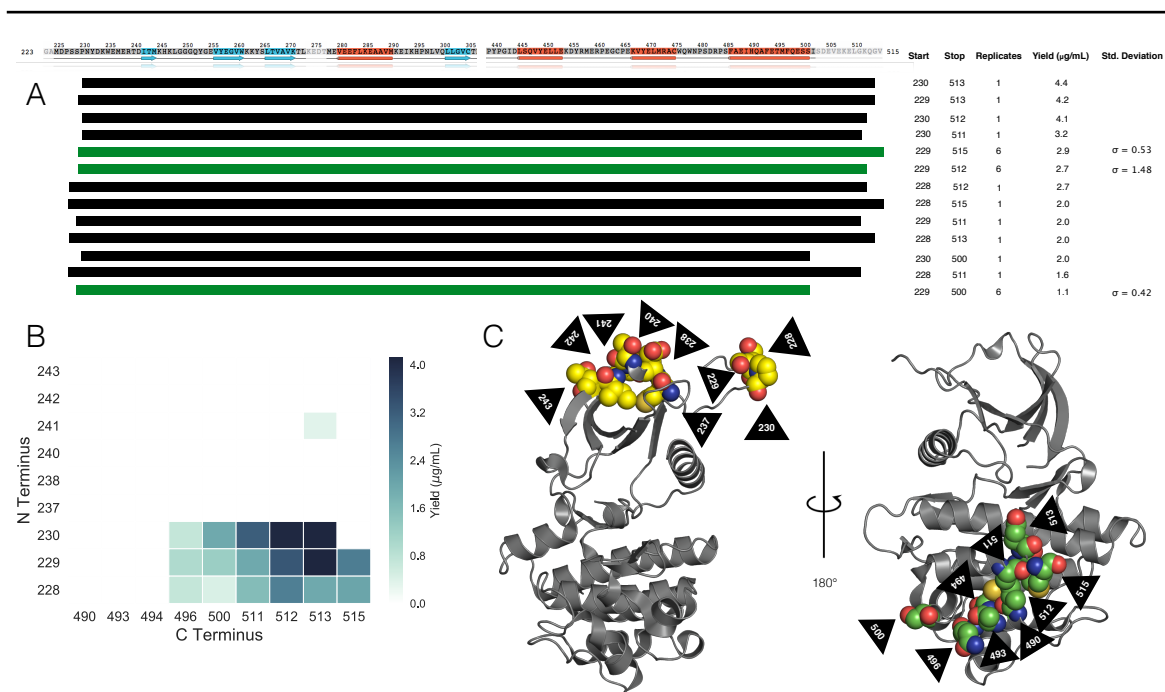

**Figure 1. Abl kinase domain construct expression screen illustrates high sensitivity to construct boundaries. (A)** Abl kinase domain construct boundaries with highest expression yields. Standard deviations of the yield are listed for control constructs for which six replicates were performed to give an indication of the uncertainty in experimental constructs. Secondary structure is indicated on the sequence. Beta sheets are colored blue and alpha helices are colored orange. **(B)** Heatmap showing average yields for constructs (in  $\mu\text{g}/\text{mL}$  culture) with detectable expression as a function of N- and C-terminal construct boundaries. **(C) left**: PDBID: 2E2B with the nine N-terminal construct boundary amino acids shown as yellow spheres. *right*: PDBID: 4XEY with the nine C-terminal construct boundary amino acids shown as green spheres. Black arrows indicate residue numbers.

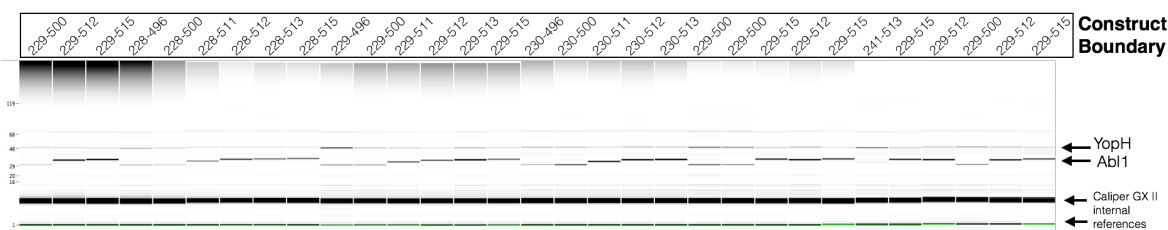

**Figure 2. Expression yields of Abl kinase domain constructs for all constructs with detectable expression.** A synthetic gel image rendering generated from Caliper GX II microfluidic gel electrophoresis data following Ni-affinity purification and thermal denaturation for all Abl constructs with detectable expression. Each well is marked with the Abl kinase domain construct residue boundaries (Uniprot canonical isoform numbering). Bands for YopH164 phosphatase (50 kDa) and Abl kinase domain constructs (28–35 kDa) are labeled.

110 Three constructs known to express in bacteria were chosen from the literature and used as controls,  
111 spanning Uniprot residues 229–500 (PDBID: 3CS9)<sup>23</sup>, 229–512 (PDBID: 2G2H)<sup>24</sup> and 229–515 (PDBID: 2E2B)<sup>25</sup>.  
112 81 constructs were generated combinatorially by selecting nine different N-terminal boundaries spanning  
113 residues 228–243 and nine different C-terminal boundaries spanning residues 490–515, chosen to be near  
114 the start and end points for the control constructs (Figure 1A). Each of the three control constructs included  
115 six replicates to provide an estimate of the typical standard error in expression readout for the experimental  
116 constructs, which was found to be between 0.42–1.5  $\mu\text{g}/\text{mL}$  (Figure 1A, green constructs).

117 Briefly, the impact of construct boundary choice on Abl kinase domain expression was tested as follows  
118 (see Methods for full details). His10-TEV N-terminally tagged wild-type Abl constructs<sup>2</sup> were coexpressed  
119 with YopH phosphatase in a 96-well format with control replicates distributed randomly throughout the  
120 plate. His-tagged protein constructs were recovered via a single nickel affinity chromatography step, and  
121 construct yields were quantified using microfluidic capillary electrophoresis following thermal denaturation.  
122 Expression yields are summarized in Figure 1A, and a synthetic gel image from the constructs with detectable  
123 expression is shown in Figure 2. Abl construct bands are present at sizes between 29 and 35 kDa (due to  
124 the variation in construct boundaries), and YopH phosphatase (which is not His-tagged but has substantial  
125 affinity for the nickel beads) is present in all samples at its expected size of 50 kDa. Strikingly, despite the  
126 fact that N-terminal and C-terminal construct boundaries only varied over 15–25 residues, only a small  
127 number of constructs produced detectable expression (Figure 1B). As highlighted in Figure 1C (left), the  
128 best N-terminal boundaries (residues 228, 229, 230) are located on a disordered strand distant from any  
129 secondary structure; N-terminal boundaries closer to the beta sheet of the N-lobe gave poor or no detectable  
130 expression (Figure 1B).

131 The best C-terminal construct boundaries (residues 511 and 512) occur in an  $\alpha$ -helix (Figure 1C, right). Of  
132 note, this  $\alpha$ -helix is not resolved in PDBID:2E2B<sup>25</sup>, suggesting this structural element may only be weakly  
133 thermodynamically stable in the absence of additional domains. In previous work, this  $\alpha$ -helix was shown to  
134 undergo a dramatic conformational change which introduces a kink at residue 516, splitting the  $\alpha$ -helix into  
135 two<sup>26</sup>. This suggests a high potential for flexibility in this region.

136 Two of the control constructs (which differ in construct boundary by only one or two residues) were in the  
137 top six expressing constructs (Figure 1A), and were in fact within 60% of the maximum observed expression  
138 yield. From this, we concluded that transferring construct boundaries from existing kinase domain structural  
139 data would be sufficient to bias our constructs toward useful expression levels for a large-scale screen of  
140 multiple kinases.

### 141 **Screen of 96 kinases finds 52 with useful levels of automated *E. coli* expression**

142 To begin exploring which human kinase domains can achieve useful expression in *E. coli* using a simple  
143 automatable expression and purification protocol, a panel of kinase domain constructs for 96 kinases, for  
144 which bacterial expression has been previously demonstrated, was assembled using a semi-automated  
145 bioinformatics pipeline. Briefly, a database was built by querying Uniprot<sup>27</sup> for human protein kinase

<sup>2</sup>Parent plasmid is a pET His10 TEV LIC cloning vector and is available on Addgene (Plasmid #78173).

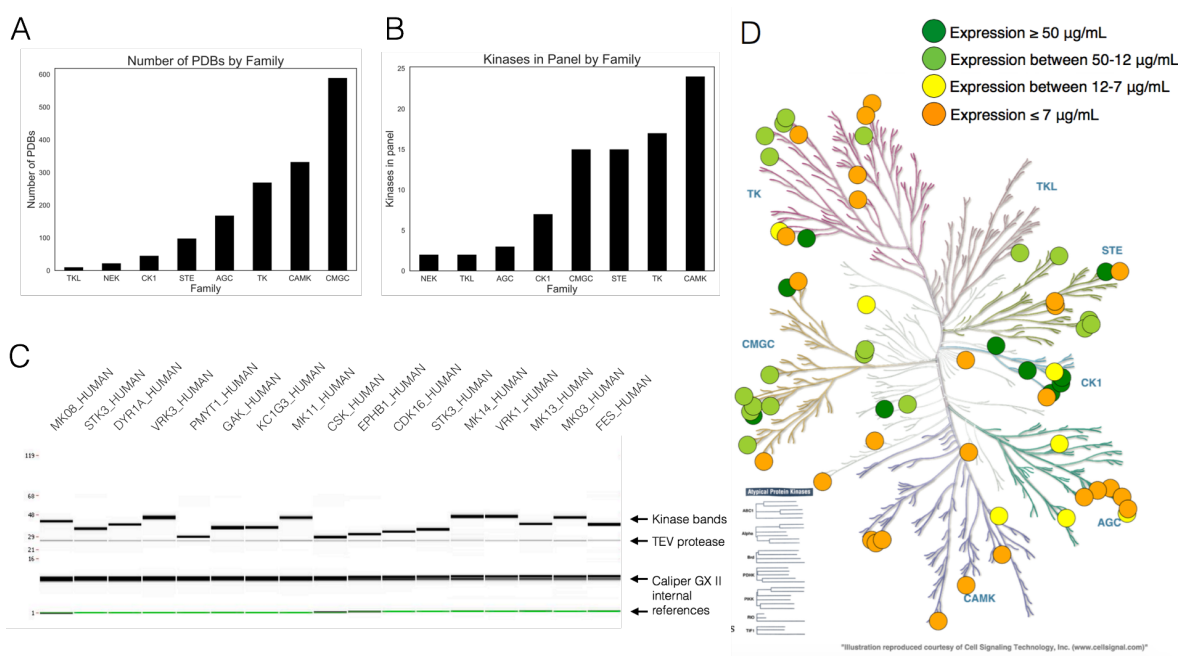

**Figure 3. Kinome wide search for expressible kinases.** (A) The number of PDB structures per kinase family, from the database built to select kinases for expression. (B) The distribution among families of candidate kinases in our expression screen. (C) Caliper GX II synthetic gel image rendering of the highest expressing kinases, quantified using microfluidic capillary electrophoresis. (D) Kinome distribution of expression based on our 96 kinase screen. Dark green circles represent kinases with expression above 50  $\mu\text{g}/\text{mL}$  culture yield. Light green circles represent kinases with expression between 50 and 12  $\mu\text{g}/\text{mL}$  yield. Yellow circles represent kinases with expression between 12 and 7  $\mu\text{g}/\text{mL}$  yield. Orange circles represent kinases with any expression (even below 2  $\mu\text{g}/\text{mL}$ ) up to 7  $\mu\text{g}/\text{mL}$  yield. Image made with KinMap: <http://www.kinhub.org/kinmap>.

146 domains that were both active and not truncated. This query returned a set of target sequences that were  
 147 then matched to their relevant PDB constructs and filtered for expression system (as determined from PDB  
 148 header `EXPRESSION_SYSTEM` records), discarding kinases that did not have any PDB entries with bacterial  
 149 expression. As a final filtering step, the kinases were compared to three purchased kinase plasmid libraries  
 150 (described in Methods), discarding kinases without a match. Construct boundaries were selected from PDB  
 151 constructs and the SGC plasmid library, both of which have experimental evidence for *E. coli* expression, and  
 152 subcloned from a plasmid in a purchased library (see Methods). Selecting the kinases and their constructs  
 153 for this expression trial in this method rested on the basis of expected success: these specific kinase  
 154 constructs were bacterially expressed and purified to a degree that a crystal structure could be solved. While  
 155 expression protocols used to produce protein for crystallographic studies are often individually tailored,  
 156 we considered these kinases to have a high likelihood of expressing in our semi-automated pipeline where  
 157 the *same* protocol is utilized for all kinases. Statistics of the number of kinases obtained from the PDB  
 158 mining procedure are shown in Figure 3A. Surprisingly, the most highly sampled family was the CAMK family,  
 159 suggesting researchers may have found this family particularly amenable to bacterial expression. Based on  
 160 the results of the previous experiment scanning Abl constructs for expression, we decided to use construct  
 161 boundaries that were reported in the literature for each kinase. This process resulted in a set of 96 plasmid  
 162 constructs distributed across kinase families (Figure 3B).

163 From these constructs, a set of 96 His10-TEV N-terminally tagged kinase domain constructs were gen-  
 164 erated, coexpressed with a phosphatase in *E. coli*, purified via nickel bead pulldown, and quantified using  
 165 microfluidic gel electrophoresis. The 96 kinases were coexpressed with either Lambda phosphatase (for  
 166 Ser/Thr kinases) or a truncated form of YopH phosphatase<sup>3</sup> (for Tyr kinases).

<sup>3</sup>Yoph164 phosphatase, engineered to minimize intrinsic affinity for nickel purification resin by the QB3 MacroLab based on parent plasmid pCDFDuet1-YOPH, a gift from the Kuriyan Lab.



**Table 1. Kinase domain constructs with yields >2  $\mu\text{g}/\text{mL}$  culture for 96-kinase expression screen.** Kinases are listed by Uniprot designation and whether they were co-expressed with Lambda or truncated YopH164 phosphatase. Yield (determined by Caliper GX II quantitation of the expected size band) reported in  $\mu\text{g}/\text{mL}$  culture, where total eluate volume was 120  $\mu\text{L}$  from 900  $\mu\text{L}$  bacterial culture. Yields are shaded green (yield > 12  $\mu\text{g}/\text{mL}$ ), yellow (12 > yield > 7  $\mu\text{g}/\text{mL}$ ) and orange (yield < 7  $\mu\text{g}/\text{mL}$ ); kinase domain constructs with yields that were undetectable or < 2  $\mu\text{g}/\text{mL}$  are not listed. ‡ denotes that the second kinase domain of KS6A1\_HUMAN was expressed; all other kinases were the first or only kinase domain occurring in the ORF. Construct boundaries are listed in UniProt residue numbering for the UniProt canonical isoform. An interactive table of expression yields and corresponding constructs is available at <http://choderalab.org/kinome-expression>

| Kinase       | Construct Boundary | Plasmid Source and ID    | Phosphatase | Yield ( $\mu\text{g}/\text{mL}$ ) |
|--------------|--------------------|--------------------------|-------------|-----------------------------------|
| MK14_HUMAN   | 1-360              | Addgene 23865            | Lambda      | 70.7                              |
| VRK3_HUMAN   | 24-352             | SGC Oxford VRK3A-c016    | Lambda      | 67.5                              |
| GAK_HUMAN    | 24-359             | SGC Oxford GAKA-c006     | Lambda      | 64.7                              |
| CSK_HUMAN    | 186-450            | Addgene 23941            | YopH        | 62.5                              |
| VRK1_HUMAN   | 3-364              | Addgene 23496            | Lambda      | 62.3                              |
| KC1G3_HUMAN  | 24-351             | SGC Oxford CSNK1G3A-c002 | Lambda      | 56.3                              |
| FES_HUMAN    | 448-822            | Addgene 23876            | YopH        | 44.0                              |
| PMYT1_HUMAN  | 24-311             | SGC Oxford PKMYT1A-c004  | Lambda      | 38.0                              |
| MK03_HUMAN   | 1-379              | Addgene 23509            | Lambda      | 36.4                              |
| STK3_HUMAN   | 16-313             | Addgene 23818            | Lambda      | 34.3                              |
| DYR1A_HUMAN  | 24-382             | SGC Oxford DYRK1AA-c004  | Lambda      | 34.1                              |
| KC1G1_HUMAN  | 24-331             | SGC Oxford CSNK1G1A-c013 | Lambda      | 34.1                              |
| MK11_HUMAN   | 24-369             | SGC Oxford MAPK11A-c007  | Lambda      | 31.7                              |
| MK13_HUMAN   | 1-352              | Addgene 23739            | Lambda      | 31.7                              |
| EPHB1_HUMAN  | 602-896            | Addgene 23930            | YopH        | 28.9                              |
| MK08_HUMAN   | 1-363              | HIP pJP1520 HsCD00038084 | Lambda      | 28.5                              |
| CDK16_HUMAN  | 163-478            | Addgene 23754            | Lambda      | 26.9                              |
| EPHB2_HUMAN  | 604-898            | HIP pJP1520 HsCD00038588 | YopH        | 25.1                              |
| PAK4_HUMAN   | 291-591            | Addgene 23713            | Lambda      | 23.9                              |
| CDK1_HUMAN   | 2-304              | SGC Oxford CDK1A-c024    | Lambda      | 23.2                              |
| SRC_HUMAN    | 254-536            | Addgene 23934            | YopH        | 22.0                              |
| STK16_HUMAN  | 24-316             | SGC Oxford STK16A-c002   | Lambda      | 20.7                              |
| MAPK3_HUMAN  | 33-349             | Addgene 23790            | Lambda      | 18.8                              |
| PAK6_HUMAN   | 383-681            | Addgene 23833            | Lambda      | 18.0                              |
| CSK22_HUMAN  | 1-334              | HIP pJP1520 HsCD00037966 | Lambda      | 17.9                              |
| MERTK_HUMAN  | 570-864            | Addgene 23900            | YopH        | 16.8                              |
| PAK7_HUMAN   | 24-318             | SGC Oxford PAK5A-c011    | Lambda      | 14.7                              |
| CSK21_HUMAN  | 1-335              | Addgene 23678            | Lambda      | 14.5                              |
| EPHA3_HUMAN  | 606-947            | Addgene 23911            | YopH        | 14.1                              |
| BMPR2_HUMAN  | 1-329              | SGC Oxford BMPR2A-c019   | Lambda      | 14.1                              |
| M3K5_HUMAN   | 659-951            | HIP pJP1520 HsCD00038752 | Lambda      | 14.0                              |
| KCC2G_HUMAN  | 24-334             | SGC Oxford CAMK2GA-c006  | Lambda      | 13.3                              |
| E2AK2_HUMAN  | 254-551            | HIP pJP1520 HsCD00038350 | Lambda      | 11.6                              |
| MK01_HUMAN   | 1-360              | HIP pJP1520 HsCD00038281 | Lambda      | 11.2                              |
| CSKP_HUMAN   | 1-340              | HIP pJP1520 HsCD00038384 | Lambda      | 10.1                              |
| CHK2_HUMAN   | 210-531            | Addgene 23843            | Lambda      | 8.1                               |
| KC1G2_HUMAN  | 4-312              | SGC Oxford CSNK1G2A-c002 | Lambda      | 7.6                               |
| DMPK_HUMAN   | 2-4-433            | SGC Oxford DMPK1A-c026   | Lambda      | 7.6                               |
| KCC2B_HUMAN  | 11-303             | Addgene 23820            | Lambda      | 7.1                               |
| FGFR1_HUMAN  | 456-763            | Addgene 23922            | YopH        | 6.1                               |
| KS6A1_HUMAN‡ | 413-735            | SGC Oxford RPS6KA1A-c036 | Lambda      | 5.7                               |
| DAPK3_HUMAN  | 9-289              | Addgene 23436            | Lambda      | 4.0                               |
| STK10_HUMAN  | 18-317             | HIP pJP1520 HsCD00038077 | Lambda      | 3.7                               |
| KC1D_HUMAN   | 1-294              | Addgene 23796            | Lambda      | 3.7                               |
| KC1E_HUMAN   | 1-294              | Addgene 23797            | Lambda      | 3.5                               |
| NEK1_HUMAN   | 23-350             | SGC Oxford NEK1A-c011    | Lambda      | 3.3                               |
| CDK2_HUMAN   | 1-297              | Addgene 23777            | Lambda      | 3.1                               |
| ABL1_HUMAN   | 229-512            | HIP pJP1520 HsCD00038619 | YopH        | 2.5                               |
| DAPK1_HUMAN  | 2-285              | HIP pJP1520 HsCD00038376 | Lambda      | 2.4                               |
| DYRK2_HUMAN  | 23-417             | SGC Oxford DYRK2A-c023   | Lambda      | 2.4                               |
| HASP_HUMAN   | 24-357             | SGC Oxford GSG2A-c009    | Lambda      | 2.3                               |
| FGFR3_HUMAN  | 449-759            | Addgene 23933            | YopH        | 2.3                               |

167 Instead of eluting with imidazole, purified kinase was cleaved off nickel beads by the addition of 10%  
 168 TEV protease to minimize phosphatase contamination in the resulting eluate, allowing us to assess whether  
 169 resulting yields would be sufficient (and sufficiently free of phosphatase) to permit activity assays. While the  
 170 initial panel of 96 kinases was well-distributed among kinase families (Figure 3B), the most highly expressing  
 171 kinases (yield of more than 12  $\mu\text{g}$  kinase/mL culture) were not evenly distributed (Figure 3D). While many of  
 172 the kinases chosen from the CMGC and CK1 families expressed well in our panel, nearly all of the kinases  
 173 from the CAMK and AGC family express below 12  $\mu\text{g}$  kinase/mL (Figure 3D). 52 kinases demonstrated a

174 useful level of soluble protein expression, here defined as greater than 2  $\mu\text{g}/\text{mL}$ , naively expected to scale  
175 up to better than 2 mg/L culture (Table 1). Some kinases (shaded green in Table 1) demonstrated very high  
176 levels of expression, while others (shaded orange in Table 1) would likely benefit from further rounds of  
177 construct boundary optimization or solubility tags to boost soluble expression. The 17 most highly expressing  
178 kinases showed relatively high purity after elution, though we note that eluting via TEV site cleavage results  
179 in a quantity of TEV protease in the eluate (Figure 3C), but does not cause the elution of the His-tagged  
180 phosphatases which would hinder the ability to perform kinase activity assays. Further optimization of  
181 elution conditions may be required for optimizing kinase recovery via TEV cleavage<sup>28-30</sup>.

182 Constructs with expression yields above 2  $\mu\text{g}/\text{mL}$  have been made available via **Addgene**:  
183 <https://www.addgene.org/kits/chodera-kinase-domains>

## 184 **High-expressing kinases are folded with a well-formed ATP binding site**

185 To determine whether the expressed kinases were properly folded, we performed both a fluorescence-based  
186 thermostability assay (Figure 4) as well as a fluorescent ATP-competitive ligand binding measurement to  
187 quantify whether the ATP binding site was well-formed (Figure 5).

### 188 Fluorescence-based thermostability assay

189 A fluorescence-based thermostability assay was performed with the hydrophobic dye SYPRO Orange to  
190 determine whether a strong two-state unfolding signal could be observed (see Methods). Also referred to as  
191 *thermofluor* or *differential scanning fluorimetry (DSF)*, as the temperature is slowly increased, unfolded proteins  
192 will expose hydrophobic patches that SYRPO orange will bind to, causing an increase in fluorescence<sup>31-33</sup>.  
193 While the fluorescence of solvated SYPRO Orange is temperature-dependent, clear unfolding temperatures  
194 ( $T_m$ ) can often be identified from peaks in the first derivative of the observed fluorescence signal. Figure 4  
195 shows the fluorescence (blue line), the absolute value of its derivative (red dashed line), and the unfolding  
196 temperature determined from the maximum absolute derivative ( $T_m$ ) for the the 14 kinases that were eluted  
197 to concentrations above 0.24 mg/mL eluate, which was determined to be the minimum concentration  
198 required for optimal resolution of melting curves upon dilution to 10  $\mu\text{L}$ . Because TEV-eluted kinase was  
199 used directly in this assay, TEV protease contaminant varies from 0.01–0.03 mg/mL in the resulting assay mix.  
200 The selected minimum concentration ensured that the kinase was roughly an order of magnitude higher  
201 concentration than the contaminating TEV.

202 Most of the kinases assayed had strong peaks above room temperature, suggesting that they are well-  
203 folded in the elution buffer (25 mM HEPES pH 7.5, 5% glycerol, 400 mM NaCl, 20 mM imidazole, 1 mM BME)  
204 at room temperature. Some kinases, such as a DYR1A and GAK (Figure 4, panels 6 and 9), had two shallow  
205 inflection points in SYPRO fluorescence as a function of temperature. While STK3 does not have a strong  
206 peak above room temperature, titration with an ATP-competitive inhibitor suggests this kinase either has a  
207 well-formed ATP binding site or folding can be induced by ligand binding (Figure 5, panel 10). As a control, a  
208 sample with no detectable kinase expression (TTK from our expression panel) was assayed (Figure 4, panel 9),  
209 which showed nearly no fluorescence signal.

### 210 ATP-competitive inhibitor binding fluorescence assay

211 To determine whether expressed kinases had well-folded ATP binding sites, we probed their ability to bind an  
212 ATP-competitive inhibitor. While a pan-kinase inhibitor such as staurosporine could be used as a fluorescent  
213 probe<sup>35</sup>, the ATP-competitive inhibitor bosutinib shows a much stronger increase in fluorescence around  
214 450–480 nm when bound to kinases with well-folded ATP binding sites<sup>34,36</sup>. While excitation at 350 nm can  
215 be used, excitation at 280 nm results in lower background, potentially due to fluorescent energy transfer  
216 between kinase and ligand. Despite the weak affinity of bosutinib for many kinases, its aqueous solubility is  
217 sufficient to provide a quantitative assessment of ATP-competitive binding to many kinases at sufficiently  
218 high concentrations to function as a useful probe<sup>34,36</sup>.

219 Here, we utilized this approach as a *qualitative* probe for ATP-competitive ligand binding, due to uncer-  
220 tainty in the ligand concentration caused by significant evaporation over the course of the sequential titration  
221 experiment (see Methods section for a more in depth discussion). 33 of the kinases in our expression panel

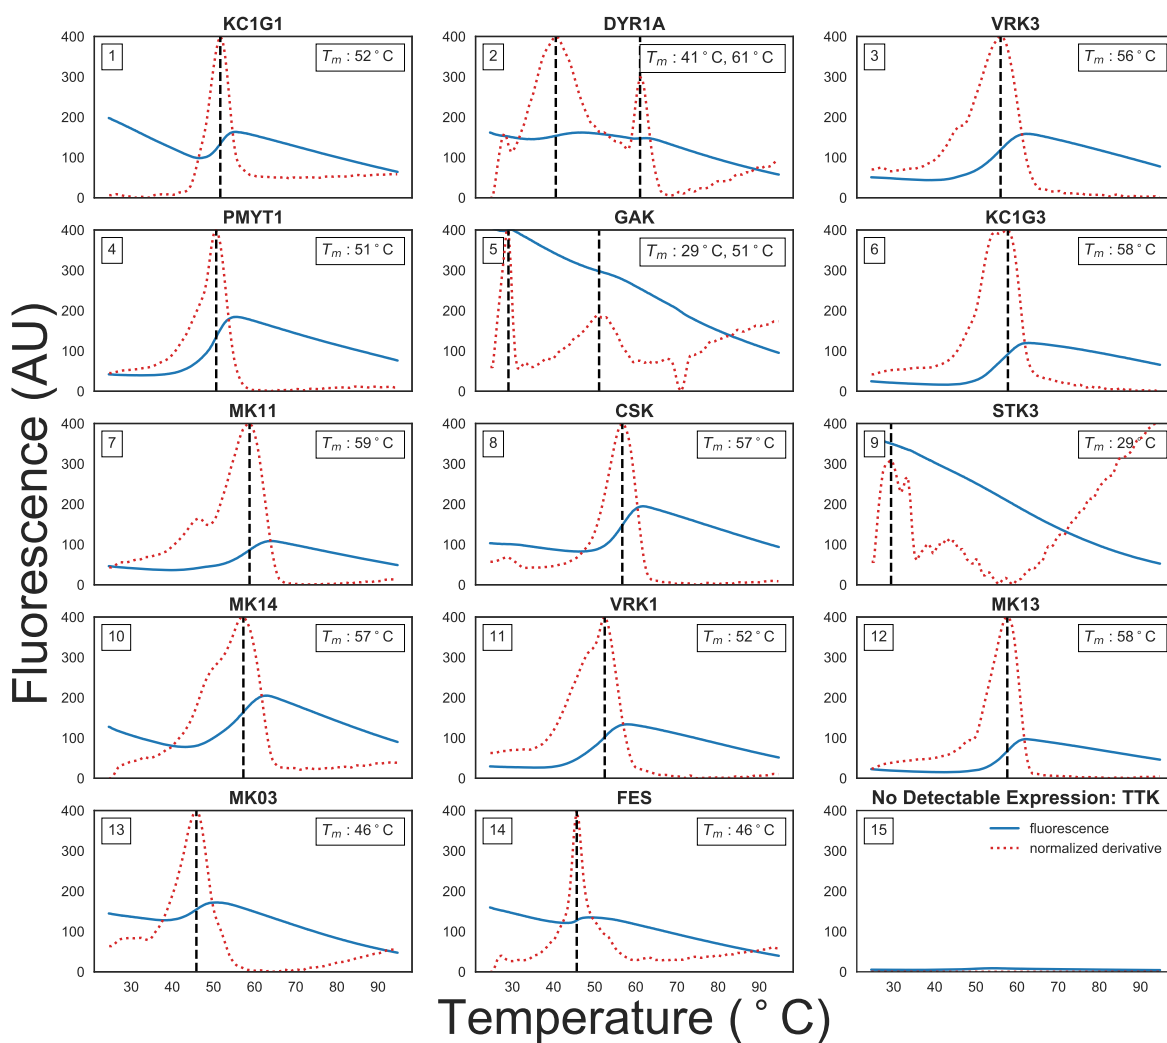

**Figure 4. Fluorescence-based thermostability assay demonstrates many high-expressing kinases are well-folded.** A fluorescence-based thermostability assay was performed on the 14 kinases shown to express above a minimum 0.24 mg/mL concentration after elution. SYPRO Orange fluorescence (solid blue line) was measured at 580 nm (half bandwidth 20 nm) after excitation at 465 nm (half bandwidth 25 nm) as the temperature was ramped from (x-axis) in Nickel Buffer A (25 mM HEPES pH 7.5, 5% glycerol, 400 mM NaCl, 20 mM imidazole, 1 mM BME). The temperature was held at 25°C for 15 sec before ramping up to 95°C with a ramp rate of 0.06°C/s. The unfolding temperature  $T_m$  (black dashed line and insert) was determined from the maxima of the normalized first derivative of fluorescence (red dashed line). Fluorescence emission at 580 nm is shown on the left y-axis. To control for signals resulting from TEV protease contamination present at 0.01–0.03 mg/mL, TTK, a kinase with no detectable expression in our panel as determined via Caliper GX II quantitation was included (panel 15).

222 had sufficient yields to prepare 100  $\mu$ L of 0.5  $\mu$ M kinase assay solutions, and were assessed for binding to  
 223 bosutinib (Figure 5, panels 1-33), with a concentration-dependent increase in fluorescence signal (colored  
 224 spectra) over the baseline ligand fluorescence titrated into buffer (gray spectra) providing evidence of a  
 225 well-formed ATP binding site. Six of the lowest expression kinase constructs (Figure 5, panels 39-44) were  
 226 prepared by diluted 20  $\mu$ L to a reaction volume of 100  $\mu$ L and assessed for bosutinib binding. Unexpectedly,  
 227 these kinases also showed evidence of binding, suggesting this assay is able to detect a well-formed ATP  
 228 binding site even for protein concentrations less than 0.5  $\mu$ M. To demonstrate that unfolded kinases do  
 229 not demonstrate this increase in fluorescence over ligand-only baseline, thermally denatured MK14 was  
 230 included as a control next to folded MK14 from a large-scale expression prep (Figure 5, panels 37–38), with  
 231 thermally denatured MK14 exhibiting little difference from titrating ligand into buffer alone.



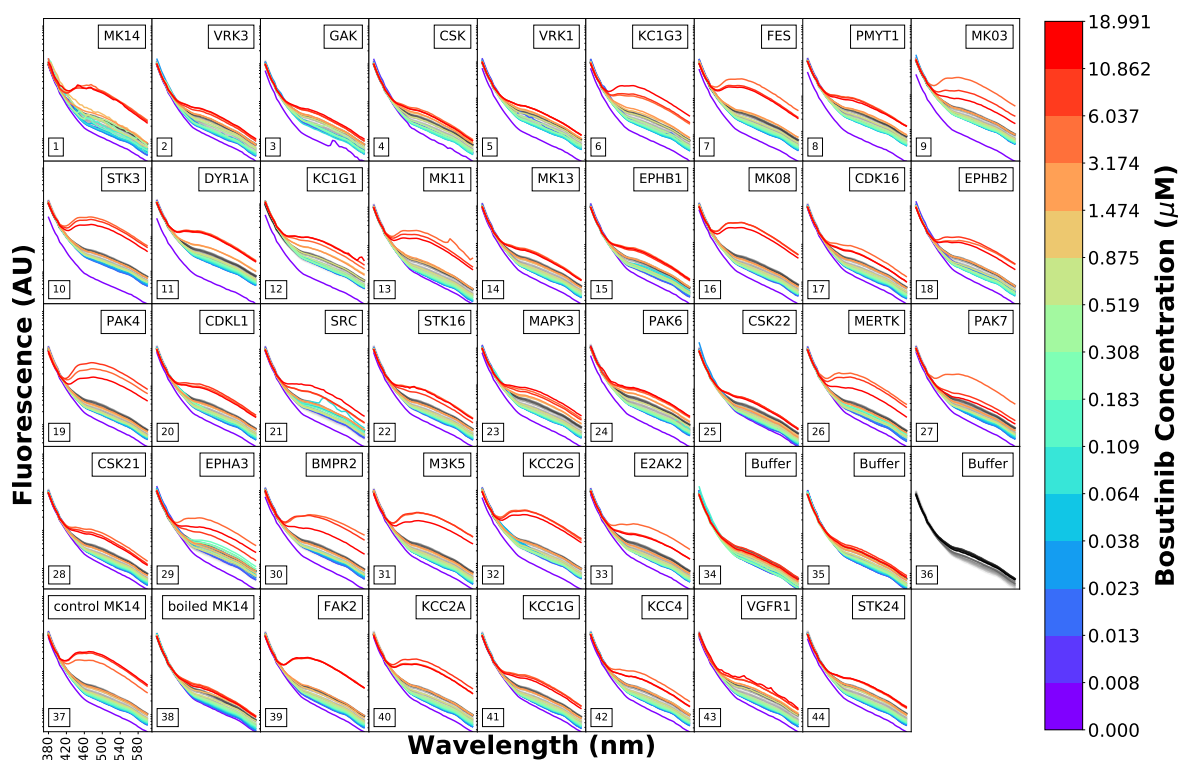

**Figure 5. Fluorescence emission spectra as a function of the fluorescent ATP-competitive kinase inhibitor bosutinib demonstrates the presence of a well-formed ATP binding pocket.** The ATP-competitive inhibitor bosutinib shows a strong increase in fluorescence centered around 450 nm when bound to kinases with well-folded ATP binding sites upon excitation at 280 nm<sup>34</sup>. To assess whether the kinases from the high-throughput expression screen were well-folded, bosutinib was titrated in a 15-concentration series geometrically spanning 0.008  $\mu\text{M}$  to 18.99  $\mu\text{M}$  (colored lines, higher concentrations are shown in warmer colors) in 15 increments for 39 expressing kinases with protein concentration adjusted to  $\sim 0.5 \mu\text{M}$  in 100  $\mu\text{L}$  assay volume. Eluted TEV protease contaminant varies from 0.01–0.03 mg/mL in the assay volumes. The control MK14 and boiled MK14 (boiled for 10 min at 95°C) were produced in a large scale expression from the same plasmid as used in the high-throughput expression protocol and they were included as positive and negative controls for bosutinib binding to ATP binding pocket. Fluorescence emission spectra (y-axis, bandwidth 20 nm) were measured from 370 nm to 600 nm (x-axis) for excitation at 280 nm (bandwidth 10 nm). For reference, the fluorescence of bosutinib titrated into buffer titration (panel 36) is shown in grayscale in each panel. Significant increases in fluorescence signal above baseline qualitatively indicate the presence of a well-formed ATP binding site.

## 232 Expressing clinically-derived Src and Abl mutants

233 Next-generation sequencing has enabled generation of massive datasets rich with missense alterations in  
 234 kinases observed directly in the clinic<sup>37–39</sup>, and has been particularly transformative in the field of oncology.  
 235 To determine how well our human kinase domain panel supports the automated expression of clinically-  
 236 identified missense mutants for biophysical, biochemical, and structural characterization, we attempted  
 237 to express 96 missense mutations mined from sequencing studies of cancer patients. The mutations were  
 238 gathered using cBioPortal<sup>40</sup> from publicly available sources and a large clinical tumor sequencing dataset  
 239 from the Memorial Sloan Kettering Cancer Center<sup>38</sup> sequenced in the MSK-IMPACT panel<sup>41</sup>.

240 Using our structural informatics pipeline, a database was built focusing on the kinases we found to be  
 241 expressible in *E. coli*. To add the mutation data, we retrieved public datasets from cBioPortal<sup>44,45</sup> along with  
 242 annotations from Oncotator<sup>46</sup> through their respective web service APIs. We then added mutations and  
 243 annotations from the MSKCC dataset<sup>38</sup> by extracting the mutations from a local copy of the dataset and  
 244 retrieving annotations from Oncotator. The annotated mutations were filtered for mutations that occurred  
 245 within the construct boundaries of our kinase domains. We found 63 unique clinical mutations appearing  
 246 within our kinase domain construct boundaries for Abl and 61 for Src. We subsequently selected 48 mutants  
 247 for Abl and 46 for Src to express, aiming for a panel of mutants distributed throughout the kinase domain

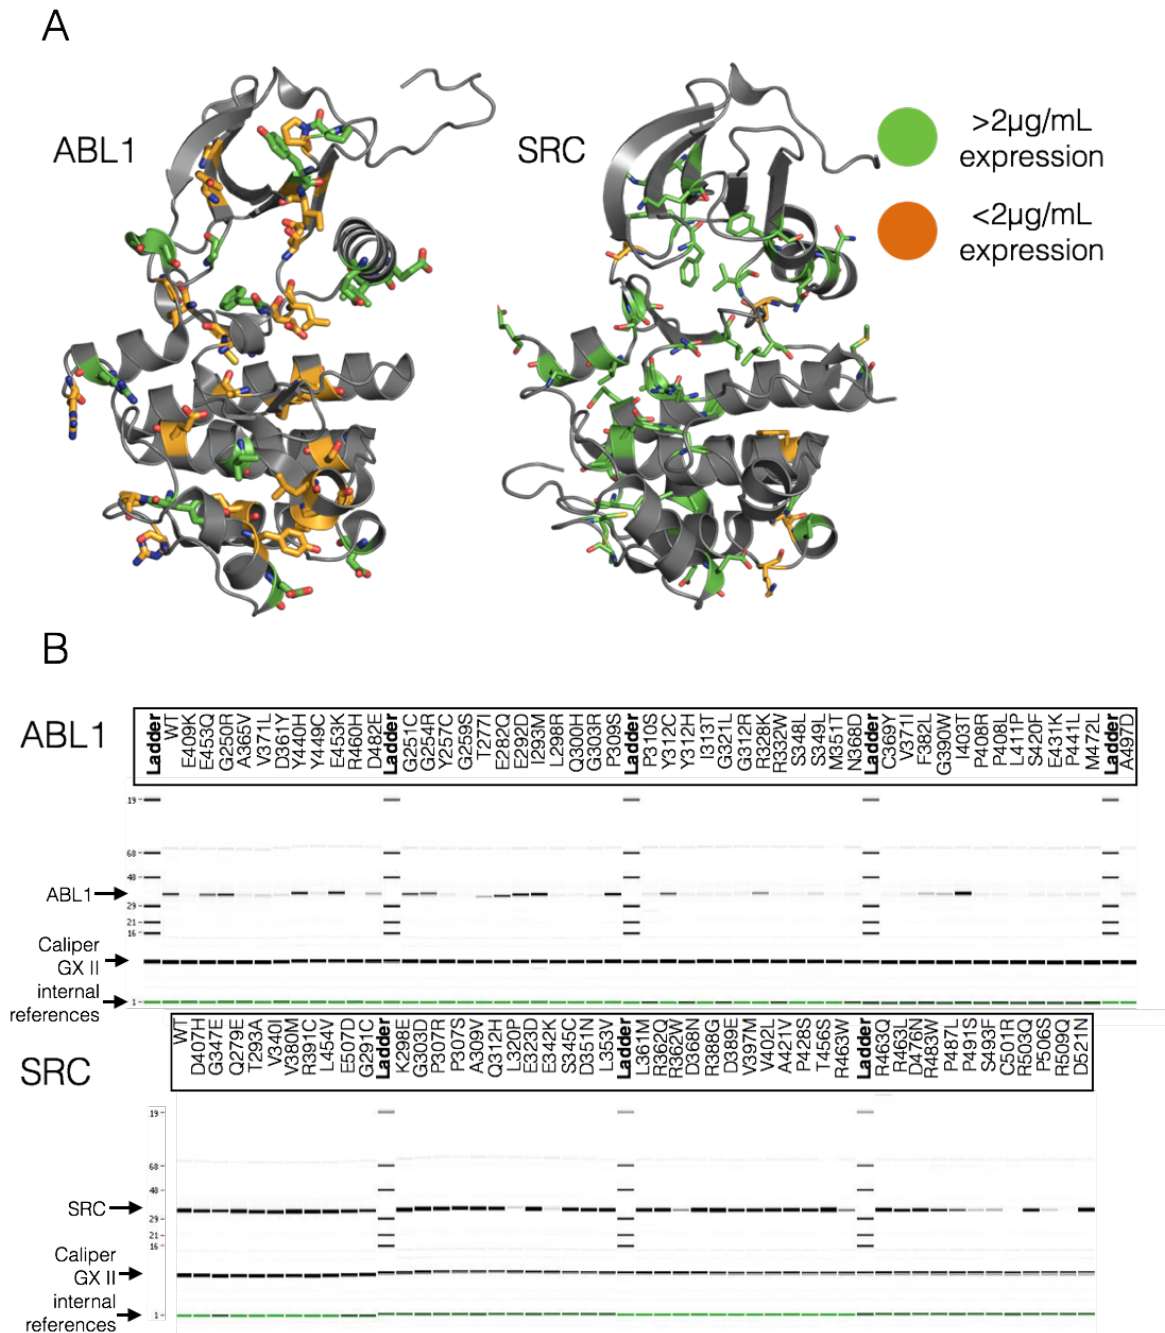

**Figure 6. Expression yields for engineered clinically-derived Src and Abl missense mutants.** (A) All Abl and Src clinically-identified mutants assessed in the expression screen are displayed as sticks. Mutants with expression yields  $>2 \mu\text{g/mL}$  are colored green, while those with yields  $<2 \mu\text{g/mL}$  are colored orange. Rendered structures are Abl (PDBID: 2E2B) and Src (PDBID: 4MXO)<sup>36</sup>. (B) Synthetic gel images showing ABL1 (top) or Src (bottom) expression, with wells labeled by missense mutation. Yield was determined by Caliper GX II quantitation of the expected size band and reported in  $\mu\text{g/mL}$  culture, where total eluate volume was  $120 \mu\text{L}$  following nickel bead pulldown purification from  $900 \mu\text{L}$  bacterial culture. Residue mutations use numbering for the Uniprot canonical isoform.

**Table 2. Expression yields for engineered clinical missense mutants of Src and Abl kinase domains with yields > 2  $\mu\text{g}/\text{mL}$  culture.** Src and Abl kinase domain constructs with engineered clinical mutations with expression yields > 2  $\mu\text{g}/\text{mL}$  culture are listed, sorted by yield. Yield was determined by Caliper GX II quantitation of the expected size band and reported in  $\mu\text{g}/\text{mL}$  culture, where total eluate volume was 80  $\mu\text{L}$  purified from 900  $\mu\text{L}$  bacterial culture. Wild-type (WT) controls for both Src and Abl (here, a single well for each) are shown as the first entry for each gene.

| Abl1 (229-512) | Mutation <sup>1</sup> | Functional Impact Score <sup>2</sup> | yield ( $\mu\text{g}/\text{mL}$ ) | % of WT expression |
|----------------|-----------------------|--------------------------------------|-----------------------------------|--------------------|
|                | WT                    | -                                    | 5.1                               | -                  |
|                | I403T                 | Low                                  | 17.8                              | 350                |
|                | I293M                 | Low                                  | 9.8                               | 193                |
|                | P309S                 | Neutral                              | 7.8                               | 153                |
|                | E453K                 | Low                                  | 7.3                               | 144                |
|                | Y440H                 | Medium                               | 7.1                               | 140                |
|                | E292D                 | Low                                  | 6.9                               | 135                |
|                | G251C                 | High                                 | 5.2                               | 102                |
|                | E282Q                 | Neutral                              | 5.1                               | 102                |
|                | G250R                 | Neutral                              | 5.1                               | 100                |
|                | G254R                 | High                                 | 5.0                               | 98                 |
|                | Y312C                 | Neutral                              | 4.7                               | 93                 |
|                | E453Q                 | Low                                  | 3.7                               | 73                 |
|                | R328K                 | Low                                  | 3.5                               | 69                 |
|                | D482E                 | Neutral                              | 2.5                               | 49                 |
|                | F382L                 | Medium                               | 2.1                               | 41                 |
|                | G390W                 | Medium                               | 2.1                               | 41                 |
| Src (254-536)  | Mutation <sup>1</sup> | Functional Impact Score <sup>2</sup> | yield ( $\mu\text{g}/\text{mL}$ ) | % of WT expression |
|                | WT                    | -                                    | 35.7                              | -                  |
|                | T456S                 | Neutral                              | 80.9                              | 227                |
|                | R388G                 | Medium                               | 61.5                              | 172                |
|                | K298E                 | High                                 | 54.5                              | 153                |
|                | V380M                 | Neutral                              | 51.7                              | 145                |
|                | D368N                 | Neutral                              | 49.9                              | 140                |
|                | D521N                 | Low                                  | 42.8                              | 120                |
|                | R463Q                 | Neutral                              | 38.4                              | 108                |
|                | R391C                 | Neutral                              | 37.5                              | 105                |
|                | E323D                 | Low                                  | 37.2                              | 104                |
|                | A309V                 | Low                                  | 35.9                              | 98                 |
|                | G303D                 | Neutral                              | 34.1                              | 96                 |
|                | R362Q                 | Neutral                              | 33.6                              | 94                 |
|                | L361M                 | Medium                               | 31.7                              | 89                 |
|                | A421V                 | Neutral                              | 30.7                              | 86                 |
|                | V402L                 | Neutral                              | 30.6                              | 86                 |
|                | V397M                 | Medium                               | 29.8                              | 84                 |
|                | Q278E                 | Neutral                              | 29.6                              | 83                 |
|                | Q312H                 | Low                                  | 29.5                              | 83                 |
|                | L353V                 | Medium                               | 29.0                              | 81                 |
|                | L454V                 | Neutral                              | 29.0                              | 81                 |
|                | P307R                 | Neutral                              | 28.6                              | 80                 |
|                | V340I                 | Low                                  | 28.0                              | 78                 |
|                | P307S                 | Neutral                              | 24.2                              | 68                 |
|                | D476N                 | Neutral                              | 23.3                              | 65                 |
|                | D351N                 | Neutral                              | 22.9                              | 64                 |
|                | T293A                 | Neutral                              | 22.2                              | 62                 |
|                | S345C                 | Low                                  | 22.2                              | 62                 |
|                | P428S                 | Medium                               | 22.2                              | 62                 |
|                | E507D                 | Neutral                              | 20.7                              | 58                 |
|                | D389E                 | High                                 | 20.0                              | 56                 |
|                | R503Q                 | Neutral                              | 17.3                              | 49                 |
|                | D407H                 | High                                 | 15.9                              | 45                 |
|                | R463L                 | Neutral                              | 14.9                              | 42                 |
|                | G291C                 | Medium                               | 11.9                              | 33                 |
|                | G347E                 | Medium                               | 10.2                              | 29                 |
|                | R483W                 | High                                 | 9.8                               | 27                 |
|                | P487L                 | Medium                               | 6.0                               | 17                 |
|                | R463W                 | Medium                               | 5.2                               | 15                 |
|                | R362W                 | Low                                  | 3.9                               | 11                 |
|                | S493F                 | Low                                  | 3.0                               | 8                  |
|                | P491S                 | Low                                  | 2.2                               | 6                  |

<sup>1</sup> Uniprot amino acid sequence numbering of primary isoform

<sup>2</sup> MutationAssessor Score<sup>42,43</sup>, which predicts functional impact via conservation

248 (Figure 6A), with wild-type sequences included as controls. Mutations were introduced using site-directed  
249 mutagenesis and assayed for expression yields (Figure 6B). Those with yields above 2  $\mu\text{g}$  kinase/mL culture  
250 are listed in Table 2.

251 High-expressing mutants appear to be distributed relatively uniformly throughout the kinase domain  
252 (Figure 6A). While the vast majority of the Src mutants expressed at a usable level, many of the Abl mutants  
253 expressed below the 2  $\mu\text{g}$ /mL threshold. This can primarily be attributed to the low level of expression for  
254 wild-type Abl construct (Table 1). In instances where kinase activity is not required, yield could be increased  
255 via the introduction of inactivating mutations<sup>21</sup> or further tailoring of expression and purification protocols.

## 256 Methods

### 257 Semi-automated selection of kinase construct sequences for *E. coli* expression

#### 258 Selection of human protein kinase domain targets

259 Human protein kinases were selected by querying the UniProt API (query date 30 May 2014) for any human  
260 protein with a domain containing the string "protein kinase", and which was manually annotated and re-  
261 viewed (i.e. a Swiss-Prot entry). The query string used was:

```
262 taxonomy:"Homo sapiens (Human) [9606]" AND domain:"protein kinase" AND reviewed:yes
```

263 Data was returned by the UniProt API in XML format and contained protein sequences and relevant PDB  
264 structures, along with many other types of genomic and functional information. To select active protein  
265 kinase domains, the UniProt domain annotations were searched using the regular expression `^Protein  
266 kinase(?!; truncated)(?!; inactive)`, which excludes certain domains annotated "Protein kinase; trun-  
267 cated" and "Protein kinase; inactive". Sequences for the selected domains, derived from the canonical  
268 isoform as determined by UniProt, were then stored.

#### 269 Matching target sequences with relevant PDB constructs

270 Each target kinase gene was matched with the homologous in any other species, if present, and all UniProt  
271 data was downloaded. This data included a list of PDB structures which contain the protein, and their  
272 sequence spans in the coordinates of the UniProt canonical isoform. PDB structures which did not include  
273 the protein kinase domain or truncated more than 30 residues at each end were filtered out. PDB coordinate  
274 files were then downloaded for each remaining PDB entry. The coordinate files contain various metadata,  
275 including the `EXPRESSION_SYSTEM` annotation, which was used to filter PDB entries for those which include  
276 the phrase "ESCHERICHIA COLI". The majority of PDB entries returned had an `EXPRESSION_SYSTEM` tag of  
277 "ESCHERICHIA COLI", while a small number had "ESCHERICHIA COLI BL21" or "ESCHERICHIA COLI BL21(DE3)".

278 The PDB coordinate files also contain SEQRES records, which should contain the protein sequence used  
279 in the crystallography or NMR experiment. According to the PDB File Format FAQ ([http://deposit.rcsb.org/  
280 format-faq-v1.html](http://deposit.rcsb.org/format-faq-v1.html)), "All residues in the crystal or in solution, including residues not present in the model (i.e.,  
281 disordered, lacking electron density, cloning artifacts, HIS tags) are included in the SEQRES records." However,  
282 we found that these records are very often misannotated, instead representing only the crystallographically  
283 resolved residues. Since expression levels can be greatly affected by insertions or deletions of only one or a  
284 few residues at either terminus<sup>47</sup>, it is important to know the full experimental sequence. To measure the  
285 authenticity of a given SEQRES record, we developed a simple metric by hypothesizing that most crystal  
286 structures would likely have at least one or more unresolved residues at one or both termini and that  
287 the presence of an expression tag, which is typically not crystallographically resolved, would indicate an  
288 authentic SEQRES record. To achieve this, unresolved residues were first defined by comparing the SEQRES  
289 sequence to the resolved sequence, using the SIFTS service to determine which residues were not present  
290 in the canonical isoform sequence<sup>48</sup>. Regular expression pattern matching was used to detect common  
291 expression tags at the N- or C-termini. Sequences with a detected expression tag were given a score of 2,  
292 while those with any unresolved sequence at the termini were given a score of 1, and the remainder were  
293 given a score of 0. This data was stored to allow for subsequent selection of PDB constructs based on likely  
294 authenticity in later steps. The number of residues extraneous to the target kinase domain, and the number  
295 of residue conflicts with the UniProt canonical isoform within that domain span were also stored for each  
296 PDB sequence.

## 297 Plasmid libraries

298 As a source of kinase DNA sequences for subcloning, we purchased three kinase plasmid libraries: the  
299 [Addgene Human Kinase ORF kit](#), a kinase library from the Structural Genomics Consortium (SGC), Ox-  
300 ford (<http://www.thesgc.org>), and a kinase library from the [PlasmID Repository](#) maintained by the Dana-  
301 Farber/Harvard Cancer Center. Annotated data for the kinases in each library was used to match them  
302 to the human protein kinases selected for this project. The plasmid open reading frames (ORFs) were  
303 translated into protein sequences and aligned against the target kinase domain sequences from UniProt.  
304 Also calculated were the number of extraneous protein residues in the ORF, relative to the target kinase  
305 domain sequence, and the number of residue conflicts with the UniProt sequence. Our aim was to subclone  
306 the chosen sequence constructs from these library plasmids into our expression plasmids.

## 307 Selection of sequence constructs for expression

308 Of the kinase domain targets selected from UniProt, we filtered out those with no matching plasmids in  
309 our available plasmid libraries or no suitable PDB construct sequences. For this purpose, a suitable PDB  
310 construct sequence was defined as any with an authenticity score greater than zero (see above). Library  
311 plasmid sequences and PDB constructs were aligned against each Uniprot target domain sequence, and  
312 various approaches were considered for selecting the construct boundaries to use for each target, and the  
313 library plasmid to subclone it from. Candidate construct boundaries were drawn from two sources: PDB  
314 constructs and the SGC plasmid library, has been successfully tested for *E. coli* expression.

315 For most of the kinase domain targets, multiple candidate construct boundaries were available. To  
316 select the most appropriate construct boundaries, we sorted them first by authenticity score, then by the  
317 number of conflicts relative to the UniProt domain sequence, then by the number of residues extraneous to  
318 the UniProt domain sequence span. The top-ranked construct was then chosen. In cases where multiple  
319 library plasmids were available, these were sorted first by the number of conflicts relative to the UniProt  
320 domain sequence, then by the number of residues extraneous to the UniProt domain sequence span, and  
321 the top-ranked plasmid was chosen. This process resulted in a set of 96 kinase domain constructs, which (by  
322 serendipity) matched the 96-well plate format we planned to use for parallel expression testing. We selected  
323 these constructs for expression testing.

324 An interactive table of the selected plasmids, constructs, and aligned PDB files can be viewed at <http://choderalab.org/kinome-expression>.  
325

## 326 Automation of the construct selection process

327 While much of this process was performed programmatically, many steps required manual supervision and  
328 intervention to correct for exceptional cases. While these exceptions were encoded programmatically as  
329 overrides to ensure the scheme could be reproduced from existing data, we hope to eventually develop a  
330 fully automated software package for the selection of expression construct sequences for a given protein  
331 family, but this was not possible within the scope of this work.

## 332 Mutagenesis protocol

333 Point mutations were introduced with a single-primer QuikChange reaction. Primers were designed to anneal  
334 at 55°C both upstream and downstream of the point mutation, and with a total length of approximately 40  
335 bases. At the codon to be modified, the fewest possible number of bases was changed. Plasmid template  
336 (160 ng) was mixed with 1  $\mu$ M primer in 1x PfuUltra reaction buffer, with 0.8 mM dNTPs (0.2 mM each) and 1  
337 U PfuUltra High-Fidelity DNA polymerase (Agilent), in a total volume of 20  $\mu$ L. Thermocycler settings were 2  
338 min at 95°C, followed by 18 cycles of 20s at 95°C, 1 min at 53°C, 12 min at 68°C (2min/kb), then 1 minute  
339 at 68°C. After cooling to room temperature, 4  $\mu$ L of the PCR reaction was added to 16  $\mu$ L CutSmart Buffer  
340 (NEB) containing 10 U DpnI (NEB). After incubation for 2.5 hours at 37°C, 6  $\mu$ L of this mixture was used to  
341 directly transform XL1-Blue chemically competent cells (Agilent) according to the manufacturer's protocol.  
342 Transformants were picked for plasmid mini-preps and the presence of the point mutations was confirmed  
343 by sequencing.



### 344 Expression testing

345 For each target, the selected construct sequence was subcloned from the selected DNA plasmid. Expression  
346 testing was performed at the QB3 MacroLab (QB3 MacroLab, University of California, Berkeley, CA 94720)  
347 [<http://qb3.berkeley.edu/macrolab/>], a core facility offering automated gene cloning and recombinant protein  
348 expression and purification services.

349 Each kinase domain was tagged with a N-terminal His10-TEV and coexpressed with either the truncated  
350 YopH164 for Tyr kinases or lambda phosphatase for Ser/Thr kinases. All construct sequences were cloned  
351 into the 2BT10 plasmid, an AMP resistant ColE1 plasmid with a T7 promoter, using ligation-independent  
352 cloning (LIC). The inserts were generated by PCR using the LICv1 forward (TACTTCCAATCCAATGCA) and  
353 reverse (TTATCCAATCCAATGTTATTA) tags on the primers. Gel purified PCR products were LIC treated with  
354 dCTP. Plasmid was linearized, gel purified, and LIC-treated with dGTP. LIC-treated plasmid and insert were  
355 mixed together and transformed into XL1-Blues for plasmid preps.

356 Expression was performed in Rosetta2 cells (Novagen) grown with Magic Media (Invitrogen autoinducing  
357 medium), 100  $\mu\text{g}/\text{mL}$  of carbenicillin and 100  $\mu\text{g}/\text{mL}$  of spectinomycin. Single colonies of transformants  
358 were cultivated with 900  $\mu\text{L}$  of MagicMedia into a gas permeable sealed 96-well block. The cultures were  
359 incubated at 37°C for 4 hours and then at 16°C for 40 hours while shaking. Next, cells were centrifuged and  
360 the pellets were frozen at -80°C overnight. Cells were lysed on a rotating platform at room temperature for  
361 an hour using 700  $\mu\text{L}$  of SoluLyse (Genlantis) supplemented with 400 mM NaCl, 20 mM imidazole, 1  $\mu\text{g}/\text{mL}$   
362 pepstatin, 1  $\mu\text{g}/\text{mL}$  leupeptin and 0.5 mM PMSF.

363 For protein purification, 500  $\mu\text{L}$  of the soluble lysate was added to a 25  $\mu\text{L}$  Protino Ni-NTA (Machery-Nagel)  
364 agarose resin in a 96-well filter plate. Nickel Buffer A (25 mM HEPES pH 7.5, 5% glycerol, 400 mM NaCl,  
365 20 mM imidazole, 1 mM BME) was added and the plate was shaken for 30 min at room temperature. The  
366 resin was washed with 2 mL of Nickel Buffer A. For the 96-kinase expression experiment, target proteins  
367 were eluted by a 2 hour incubation at room temperature with 10  $\mu\text{g}$  of TEV protease in 80  $\mu\text{L}$  of Nickel Buffer  
368 A per well and a subsequent wash with 40  $\mu\text{L}$  of Nickel Buffer A to maximize protein release. Nickel Buffer  
369 B (25 mM HEPES pH 7.5, 5% glycerol, 400 mM NaCl, 400 mM imidazole, 1 mM BME) was used to elute TEV  
370 resistant material remaining on the resin. Untagged protein eluted with TEV protease was run on a LabChip  
371 GX II Microfluidic system to analyze the major protein species present.

372 For the clinical mutant and Abl1 construct boundaries expression experiments, target proteins were  
373 washed three times with Nickel Buffer A prior to elution in 80  $\mu\text{L}$  Nickel Buffer B. The eluted protein was run  
374 on a LabChip GX II Microfluidic system to analyze with major protein species were present.

### 375 Fluorescence-based thermostability assay

376 To assess whether the highly-expressed wild-type kinase constructs are folded, a thermofluor thermostability  
377 assay<sup>31-33</sup> was performed for kinase constructs that have a minimum of 0.24 mg/mL protein concentration  
378 in the eluate. After diluting 9  $\mu\text{L}$  of eluate by 1  $\mu\text{L}$  dye, the effective assay concentration is 0.216 mg/mL  
379 minimum in 10  $\mu\text{L}$  assay volume. Previous optimization efforts in the lab determined that 0.20 mg/mL was  
380 the lower limit of well-defined  $T_m$  detection. This minimum concentration also ensured that the kinase was  
381 present at roughly an order of magnitude concentration higher than contaminating TEV protease.

382 Kinase expression panel eluates, which were kept in 96-well deep well plate frozen at -80°C for 2 years  
383 prior to the thermal stability assay, were thawed in an ice-water bath for 30 min. 9  $\mu\text{L}$  of each kinase eluate  
384 was added to a 384 well PCR plate (4titude-0381). 100X SYPRO Orange dye solution was prepared from a  
385 5000X DMSO solution of SYPRO Orange Protein Gel Stain (Life Technologies, Ref S6650, LOT 1790705) by  
386 dilution in distilled water. In initial experiments, SYPRO Orange dye solution was diluted in kinase binding  
387 assay buffer (20 mM Tris 0.5 mM TCEP pH 8), which caused the dye to precipitate out of solution. Particulates  
388 in the dye solution were pelleted by tabletop centrifugation (2 min, 5000 RCF) and the solution was kept  
389 covered with aluminum foil in the dark to prevent photodamage. 1  $\mu\text{L}$  of 100X dye solution was added  
390 to each kinase eluate sample in 384-well PCR plate. The plate was sealed with Axygen UC-500 Ultra Clear  
391 Pressure Sensitive sealing film. To remove any air bubbles, the sample plate was centrifuged for 30 sec with  
392 250 g using Bionex HiG4 centrifuge. Sample mixing was performed by orbital shaking with Inheco shakers  
393 for 2 min at 1000 RPM.

394 A thermofluor melt was performed using a LightCycler 480 (Roche) qPCR instrument using an excitation  
395 filter of 465 nm (half bandwidth 25 nm) and emission filter at 580 nm (half bandwidth 20 nm). LightCycler  
396 480 Software Version 1.5.1 was used to operate the instrument and analyze the results. The temperature  
397 was held at 25°C for 15 s before ramping up to 95°C with a ramp rate of 0.06°C/s. During temperature ramp  
398 10 fluorescence acquisitions/°C were recorded with dynamic integration time mode, melt factor of 1, quant  
399 factor of 10, and maximum integration time of 2 sec. Thermal protein denaturation causes hydrophobic  
400 patches of protein to be exposed, which SYPRO Orange dye can bind. Binding of SYPRO Orange dye is  
401 detected as an increase in fluorescence at 580 nm. Presence of a clear thermal denaturation peak in the  
402 absolute value of the derivative of the fluorescence as a function of temperature serves as an indication  
403 that the proteins were well-folded. Observed fluorescence was plotted as a function of temperature, and a  
404 melting temperature  $T_m$  was determined as the maximum of the absolute value of its first derivative.

#### 405 ATP-competitive inhibitor binding fluorescence assay

406 To determine whether the expressed kinases had a well-folded ATP-binding site, we assessed whether the  
407 eluted kinase was capable of binding the ATP-competitive small molecule kinase inhibitor bosutinib. We  
408 designed fluorescence-based binding assays following earlier work reporting that this quinoline-scaffold  
409 inhibitor undergoes a strong increase in fluorescence upon binding (even weakly) to kinase ATP-binding  
410 sites<sup>34</sup>. By titrating in the ligand to close to the solubility limit, even weak binding to the ATP-binding site can  
411 be detected by observing emission increases around 450 nm during excitation at 280 nm.

412 For 33 of the kinases in our expression panel, 0.5  $\mu\text{M}$  kinase solutions from kinase expression panel  
413 eluates were prepared in kinase binding assay buffer (20 mM Tris 0.5 mM TCEP pH 8) for a final volume  
414 of 100  $\mu\text{L}$  in a black 96-well vision plate (4titude-0223). Six low-expressing kinases (Figure 5, panels 39-44)  
415 were prepared by diluting 20  $\mu\text{L}$  of eluate in kinase binding assay buffer (20 mM Tris 0.5 mM TCEP pH 8) to a  
416 final volume of 100  $\mu\text{L}$ , for final concentrations below 0.5  $\mu\text{M}$ . The plate was shaken for 2 min clockwise and  
417 2 min counter-clockwise by orbital shaking with Inheco shakers at 2000 RPM and centrifuged for 30 sec with  
418 1000 g using Bionex HiG4 centrifuge. Fluorescence emission spectra were measured from 370 nm to 600 nm  
419 (20 nm bandwidth) in 5 nm steps using 280 nm excitation (10 nm bandwidth) from both the top and bottom  
420 of the well using a Tecan Infinite M1000 PRO.

421 Bosutinib free base (LC Labs, cat no. B-1788, lot no. BSB-103, M.W. 530.45 Da) was dispensed directly  
422 from a roughly 10 mM DMSO stock solution to the assay solution using a Tecan HP D300 Digital Dispenser.  
423 The 10 mM DMSO stock solution was prepared gravimetrically using an automated balance (Mettler Toledo  
424 Balance XPE205 with LabX Laboratory Software) by dispensing 39.02 mg solid Bosutinib powder stored  
425 under nitrogen gas at 25°C into 8.0499 g DMSO (Alfa Aesar, cat no. 42780, log no. Y25B604, density 1.1004  
426 g/mL at ambient temperature) which is kept dry under argon gas at 25°C. To minimize atmospheric water  
427 absorption due to the hygroscopic nature of DMSO, the 10 mM stock solution was pipetted into wells of  
428 a 96-well stock plate by an automated liquid handling device (Tecan EVO 200 with air LiHa) and sealed  
429 with foil seal (PlateLoc). Ligand was dispensed to the assay plate with HP D300 (using aliquots of stock  
430 solution pipetted from a freshly pierced stock plate well) targeting a roughly geometrically-increasing series  
431 of ligand concentrations in each well to achieve the following total ligand concentrations after each dispense:  
432 0.008  $\mu\text{M}$ , 0.013  $\mu\text{M}$ , 0.023  $\mu\text{M}$ , 0.038  $\mu\text{M}$ , 0.064  $\mu\text{M}$ , 0.109  $\mu\text{M}$ , 0.183  $\mu\text{M}$ , 0.308  $\mu\text{M}$ , 0.519  $\mu\text{M}$ , 0.875  $\mu\text{M}$ ,  
433 1.474  $\mu\text{M}$ , 3.174  $\mu\text{M}$ , 6.037  $\mu\text{M}$ , 10.862  $\mu\text{M}$ , 18.991  $\mu\text{M}$ . The plate was shaken by HP D300 for 10 sec after  
434 usage of each dispensehead. After each titration, the plate was shaken with Inheco shakers (2 min clockwise  
435 and counter-clockwise, 2000 RPM, orbital shaking) and centrifuged (30 sec, 1000 g) using a Bionex HiG4  
436 centrifuge. Fluorescence spectra from 370 nm to 600 nm (bandwidth 20 nm) in 5 nm steps using 280 nm  
437 excitation (bandwidth 10 nm) were read from both the top and bottom of the well using a Tecan Infinite  
438 M1000 PRO. In total, the experiment took 17.5 hours to complete due to the time-consuming spectral read  
439 after each dispense, likely resulting in significant evaporation from some wells during the experiment.

440 ATP-competitive binding was analyzed qualitatively for each kinase by plotting the fluorescence spectra  
441 as a function of concentration to detect concentration-dependent increases in fluorescence. As a control for  
442 background ligand fluorescence independent of protein binding, fluorescence spectra of three replicates of  
443 ligand into buffer titrations were plotted. As a positive control, MK14 produced by a validated large scale

444 expression protocol (see Supplementary Methods) from the same plasmid used in the high-throughput  
445 protocol was included. To control for non-specific binding to unfolded protein, we included boiled MK14  
446 (prepared from the large scale expression of MK14 by boiling at 95°C for 10 min). A concentration-dependent  
447 increase in fluorescence was interpreted as evidence that the ATP-binding site of the kinase was well folded  
448 and allowed for bosutinib binding. Due to the length of the experiment, it is possible that evaporation  
449 reduced the well volume below 100  $\mu$ L and potentially caused bosutinib to reach higher concentration levels  
450 than expected. This creates uncertainty for data points, as bosutinib may either be a higher concentration  
451 (due to evaporation) or a lower concentration (due to potential precipitation caused by lower well volumes)  
452 than expected. For this reason, we have interpreted the experiment as qualitative evidence of binding,  
453 instead of quantitatively. Bosutinib binding is an indication of proper folding of the ATP binding pocket of  
454 these recombinantly expressed kinase constructs.

## 455 Discussion

456 We have demonstrated that a simple, uniform, automatable protocol is able to achieve useful bacterial  
457 expression yields for a variety of kinase domain constructs. While yields could likely be further improved by  
458 a variety of methods—such as the addition of solubility-promoting tags, construct domain boundary and  
459 codon optimization, or mutations to improve the solubility or ablate catalytic activity—the simplicity of this  
460 approach suggests widespread utility of automated bacterial expression for biophysical, biochemical, and  
461 structural biology work for the further study of human kinase domains.

462 Our expression test of 81 different construct boundaries of the Abl kinase domain demonstrated a  
463 surprising sensitivity of expression yields to the precise choice of boundary. This sensitivity may be related  
464 to where the construct is truncated with respect to the secondary structure of the protein, as disrupting  
465 secondary structure could cause the protein to improperly fold, leading to low soluble protein yield even  
466 when total expression is high. Of note, the highest expressing C-terminal boundaries for Abl were residues  
467 511 and 512. These residues fall in the regulatory  $\alpha$  helix  $\alpha$ <sup>26</sup>. This helix has been shown to undergo a  
468 dramatic conformational change upon binding to the myristoylated N-terminal cap, which introduces a sharp  
469 "kink" in residues 516–519. These residues may lead to higher levels of soluble expression by truncating  
470 an secondary structural element that is unusually flexible. Indeed, this helix is not resolved in some X-ray  
471 structures (PDBID:2E2B)<sup>25</sup>, further suggesting that this helix is less thermodynamically stable than expected.  
472 Control replicates of three constructs indicate good repeatability of expression yields in the high-throughput  
473 format. This screen suggests that optimization of construct boundaries could potentially further greatly  
474 increase yields of poorly expressing kinase domains. Codon optimization for bacterial expression could  
475 also increase expression for kinase domains with low yield due to codon bias<sup>49</sup>, as could coexpression with  
476 chaperones<sup>50</sup>.

477 For those kinases that did express, a fluorescence-based thermostability assay indicated that many of the  
478 highest-expressing kinases are well folded. An ATP-competitive inhibitor binding fluorescent assay provides  
479 qualitative evidence that the 39 kinases that had sufficiently high expression levels to be assayed have a  
480 well-formed ATP-binding site capable of binding bosutinib, a small molecule ATP-competitive kinase inhibitor.  
481 Taken together, these two experiments demonstrate that our expression protocol produces folded kinases  
482 with utility for biophysical experiments and drug design.

483 The tolerance of these bacterial constructs to many engineered clinical missense mutations suggests  
484 a promising route to the high-throughput biophysical characterization of the effect of clinical mutants on  
485 anticancer therapeutics. Mutations that did not express well may destabilize the protein, or may increase the  
486 specific activity of the kinase. A higher specific activity would require more phosphatase activity, wasting ATP  
487 to prevent high levels of phosphorylation that have been hypothesized to cause difficulty expressing kinases  
488 without a coexpressed phosphatase in bacteria<sup>21</sup>. Mutations that are destabilizing may show improved  
489 expression if coexpressed with more elaborate chaperones such as GroEL and Trigger factor<sup>50</sup>. Mutations  
490 that increase the specific activity of the kinase might also express better when combined with an inactivating  
491 mutation.

492 High-throughput automated kinase expression could be combined with enzymatic or biophysical tech-  
493 niques for characterizing the potency of a variety of clinical kinase inhibitors to assess which mutations

494 confer resistance or sensitivity. While the process of engineering, expressing, purifying, and assaying mu-  
495 tants currently takes approximately two weeks, it is possible that new techniques for cell-free bacterial  
496 expression<sup>51,52</sup> may reduce this time to a matter of days or hours in a manner that might be compatible with  
497 clinical time frames to impact therapeutic decision-making.

498 We hope that other laboratories find these resources useful in their own work.

## 499 Author Contributions

500 Conceptualization, JDC, DLP, SKA, MI, LRL, SMH, NML, MAS; Methodology, DLP, MI, LRL, SMH, SKA, JDC, NML,  
501 MAS; Software, DLP, JDC, SMH; Formal Analysis, SKA, JDC, MI, SMH; Investigation, MI, LRL, SG, CJ, SKA, SMH;  
502 Resources, CJ, SG; Data Curation, SKA, MI, LRL, DLP, JMB; Writing-Original Draft, SKA, LRL, DLP, JDC, SG, SMH,  
503 MI; Writing - Review and Editing, SKA, JDC, MI, LRL, SHM, SG, CJ, NML, MAS; Visualization, SKA, JDC, MI, SMH;  
504 Supervision, JDC, NML, MAS; Project Administration, SKA, JDC, MI, SMH; Funding Acquisition, JDC, SMH

## 505 Acknowledgments

506 DLP, SMH, LRL, SKA, MI, and JDC acknowledge support from the Sloan Kettering Institute. This work was  
507 funded in part by the Marie-Josée and Henry R. Kravis Center for Molecular Oncology, the National Institutes  
508 of Health (NIH grant R01 GM121505 and National Cancer Institute Cancer Center Core grant P30 CA008748),  
509 the Functional Genomics Institute (FGI) at MSKCC, and a Louis V. Gerstner Young Investigator Award. MAS  
510 acknowledges funding support by NIH grant R35 GM119437. The authors are grateful to Gregory Ross  
511 (MSKCC) for assistance in preparing the computational infrastructure for selecting clinical point mutants,  
512 and to Sarah E. Boyce (current address: Schrödinger, New York, NY) for assistance with multiple stages of  
513 this project. We gratefully acknowledge the members of the MSKCC Molecular Diagnostics Service in the  
514 Department of Pathology for their efforts in collecting and compiling mutations for Abl and Src kinases  
515 used here. We thank the Kuriyan lab for the gift of pCDFDuet1-YOPH plasmid. The authors are grateful to  
516 [Addgene](#) for their help in making the plasmids generated by this work available to the research community  
517 at minimal cost.

## 518 References

- 519 [1] Manning, G.; Whyte, D. B.; Martinez, R.; Hunter, T.; Sudarsanam, S. *Science* **2002**, *298*, 1912–1934.
- 520 [2] Hunter, T.; Manning, G. In *Receptor Tyrosine Kinases: Structure, Functions and Role in Human Disease*; Wheeler, D. L.,  
521 Yarden, Y., Eds.; Springer New York: New York, NY, 2015; pp 1–15.
- 522 [3] Knight, Z. A.; Lin, H.; Shokat, K. M. *Nature Reviews Cancer* **2010**, *10*, 130–137.
- 523 [4] American Cancer Society, Cancer Facts & Figures 2015. 2015.
- 524 [5] Cohen, P.; Tcherpakov, M. *Cell* **2010**, *143*, 686–693.
- 525 [6] Santos, R.; Ursu, O.; Gaulton, A.; Bento, A. P.; Donadi, R. S.; Bologa, C. G.; Karlsson, A.; Al-Lazikani, B.; Hersey, A.;  
526 Oprea, T. I.; Overington, J. P. *Nat. Rev. Drug Discov.* **2016**, *16*, 19–34.
- 527 [7] Stegmeier, F.; Warmuth, M.; Sellers, W. R.; Dorsch, M. *Clin. Pharm. & Therap.* **2010**, *87*, 543–552.
- 528 [8] Wu, P.; Nielsen, T. E.; Clausen, M. H. *Trends in Pharmacological Sciences* **2015**, *36*, 422–439.
- 529 [9] Roskoski Jr., R. USFDA approved protein kinase inhibitors. 2017; <http://www.brimr.org/PKI/PKIs.htm>, Updated 3 May  
530 2017.
- 531 [10] Volkamer, A.; Eid, S.; Turk, S.; Jaeger, S.; Rippmann, F.; Fulle, S. *Journal of Chemical Information and Modeling* **2015**, *55*,  
532 538–549, PMID: 25557645.
- 533 [11] Pao, W.; Miller, V. A.; Politi, K. A.; Riely, G. J.; Somwar, R.; Zakowski, M. G.; Maureen F nd Kris; Varmus, H. *PLoS medicine*  
534 **2005**, *2*, e73.
- 535 [12] Chandarlapaty, S.; Sawai, A.; Scaltriti, M.; Rodrik-Outmezguine, V.; Grbovic-Huezo, O.; Serra, V.; Majumder, P. K.;  
536 Baselga, J.; Rosen, N. *Cancer Cell* **2011**, *19*, 58–71.

- 537 [13] Jia, Y. et al. *Nature* **2016**, *534*, 129–132.
- 538 [14] Politi, K.; Ayeni, D.; Lynch, T. *Cancer Cell* **2015**, *27*, 751–753.
- 539 [15] Song, Z.; Wang, M.; Zhang, A. *Acta Pharmaceutica Sinica B* **2015**, *5*, 34–37.
- 540 [16] Karaman, M. W. et al. *Nature Biotech.* **2008**, *26*, 127–132.
- 541 [17] Davis, M. I.; Hunt, J. P.; Herrgard, S.; Ciceri, P.; Wodicka, L. M.; Pallares, G.; Hocker, M.; Treiber, D. K.; Zarrinkar, P. P.  
542 *Nature biotechnology* **2011**, *29*, 1046–1051.
- 543 [18] Médard, G.; Pachi, F.; Ruprecht, B.; Klaeger, S.; Heinzlmeir, S.; Helm, D.; Qiao, H.; Ku, X.; Wilhelm, M.; Kuehne, T.;  
544 Wu, Z.; Dittmann, A.; Hopf, C.; Kramer, K.; Kuster, B. *Journal of proteome research* **2015**, *14*, 1574–1586.
- 545 [19] Chambers, S. P.; Austen, D. A.; Fulghum, J. R.; Kim, W. M. *Protein Expression and Purification* **2004**, *36*, 40–47.
- 546 [20] Wang, L.; Foster, M.; Zhang, Y.; Tschantz, W. R.; Yang, L.; Worrall, J.; Loh, C.; Xu, X. *Protein Express. Pur.* **2008**, *61*,  
547 204–211.
- 548 [21] Seeliger, M. A.; Young, M.; Henderson, M. N.; Pellicena, P.; King, D. S.; Falick, A. M.; Kuriyan, J. *Protein Sci.* **2005**, *14*,  
549 3135–3139.
- 550 [22] The Structural Genomics Consortium, SGC: Progress in protein kinase structural biology. 2012; <http://www.thesgc.org/scientists/resources/kinases>, Updated 18 Jul 2012.
- 551
- 552 [23] Weisberg, E. et al. *Cancer Cell* **2005**, *7*, 129–141.
- 553 [24] Levinson, N. M.; Kuchment, O.; Shen, K.; Young, M. A.; Koldobskly, M.; Karplus, M.; Cole, P. A.; Kuriyan, J. *Plos Biology*  
554 **2006**, *4*, e144.
- 555 [25] Horio, T.; Hamasaki, T.; Inoue, T.; Wakayama, T. *Bioorganic & medicinal ...* **2007**,
- 556 [26] Nagar, B.; Hantschel, O.; Young, M. A.; Scheffzek, K.; Veach, D.; Bornmann, W.; Clarkson, B.; Superti-Furga, G.; Kuriyan, J.  
557 *Cell* **2003**, *112*, 859–871.
- 558 [27] UniProt Consortium, *Nucl. Acids Res.* **2017**, *45*, D158–D169.
- 559 [28] Puhl, A. C.; Giacomini, C.; Irazoqui, G.; Batista Viera, F.; Villarino, A.; Terenzi, H. *Biotechnology and Applied Biochemistry*  
560 **2009**, *53*, 165–174.
- 561 [29] Nallamsetty, S.; Kapust, R. B.; Tözsér, J.; Cherry, S.; Tropea, J. E.; Copeland, T. D.; Waugh, D. S. *Protein expression and*  
562 *purification* **2004**, *38*, 108–115.
- 563 [30] Sun, C.; Liang, J.; Shi, R.; Gao, X.; Zhang, R.; Hong, F.; Yuan, Q.; Wang, S. *Protein expression and purification* **2012**, *82*,  
564 226–231.
- 565 [31] Lo, M.-C.; Aulabaugh, A.; Jin, G.; Cowling, R.; Bard, J.; Malamas, M.; Ellestad, G. *Analytical Biochemistry* **2004**, *332*,  
566 153–159.
- 567 [32] Ericsson, U. B.; Hallberg, B. M.; Detitta, G. T.; Dekker, N.; Nordlund, P. *Analytical Biochemistry* **2006**, *357*, 289–298.
- 568 [33] Matulis, D.; Kranz, J. K.; Salemme, F. R.; Todd, M. J. *Biochemistry* **2005**, *44*, 5258–5266.
- 569 [34] Levinson, N. M.; Boxer, S. G. *PLoS One* **2012**, *7*, e29828.
- 570 [35] Iyer, G. H.; Taslimi, P.; Pazhanisamy, S. *Analytical Biochemistry* **2008**, *373*, 197–206.
- 571 [36] Levinson, N. M.; Boxer, S. G. *Nature chemical biology* **2014**, *10*, 127–132.
- 572 [37] Varghese, A. M.; Berger, M. F. *Genome biology* **2014**, *15*, 427.
- 573 [38] Zehir, A. et al. *Nature medicine* **2017**, *159*, 676.
- 574 [39] Garraway, L. A. *Journal of clinical oncology : official journal of the American Society of Clinical Oncology* **2013**, *31*,  
575 1806–1814.
- 576 [40] Cerami, E.; Gao, J.; Dogrusoz, U.; Gross, B. E.; Sumer, S. O.; Aksoy, B. A.; Jacobsen, A.; Byrne, C. J.; Heuer, M. L.;  
577 Larsson, E.; Antipin, Y.; Reva, B.; Goldberg, A. P.; Sander, C.; Schultz, N. *Cancer Discovery* **2012**, *2*, 401–404.
- 578 [41] Cheng, D. T. et al. *The Journal of Molecular Diagnostics* **2015**, *17*, 251–264.



- 579 [42] Reva, B.; Antipin, Y.; Sander, C. **2007**, *8*, R232.
- 580 [43] Reva, B.; Antipin, Y.; Sander, C. *Nucleic Acids Research* **2011**, *39*, e118.
- 581 [44] Cerami, E.; Gao, J.; Dogrusoz, U.; Gross, B. E.; Sumer, S. O.; Aksoy, B. A.; Jacobsen, A.; Byrne, C. J.; Heuer, M. L.;  
582 Larsson, E.; Antipin, Y.; Reva, B.; Goldberg, A. P.; Sander, C.; Schultz, N. *Cancer discovery* **2012**, *2*, 401–404.
- 583 [45] Gao, J.; Aksoy, B. A.; Dogrusoz, U.; Dresdner, G.; Gross, B.; Sumer, S. O.; Sun, Y.; Jacobsen, A.; Sinha, R.; Larsson, E.;  
584 Cerami, E.; Sander, C.; Schultz, N. *Science signaling* **2013**, *6*, pl1–pl1.
- 585 [46] Ramos, A. H.; Lichtenstein, L.; Gupta, M.; Lawrence, M. S.; Pugh, T. J.; Saksena, G.; Meyerson, M.; Getz, G. *Human*  
586 *mutation* **2015**, *36*, E2423–9.
- 587 [47] Klock, H. E.; Koesema, E. J.; Knuth, M. W.; Lesley, S. A. *Proteins: Structure, Function, and Bioinformatics* **2008**, *71*, 982–994.
- 588 [48] Velankar, S.; Dana, J. M.; Jacobsen, J.; van Ginkel, G.; Gane, P. J.; Luo, J.; Oldfield, T. J.; O'Donovan, C.; Martin, M.-J.;  
589 Kleywegt, G. J. *Nucleic Acids Research* **2013**, *41*, D483.
- 590 [49] Sørensen, H. P.; Mortensen, K. K. *Journal of Biotechnology* **2005**, *115*, 113 – 128.
- 591 [50] Haacke, A.; Fendrich, G.; Ramage, P.; Geiser, M. *Protein Expr. Purif.* **2009**, *64*, 185–193.
- 592 [51] Kim, D.-M.; Swartz, J. R. *Biotechnol. Bioeng.* **1999**, *66*, 180–188.
- 593 [52] Sawasaki, T.; Ogasawara, T.; Morishita, R.; Endo, Y. *Proc. Natl. Acad. Sci.* **2002**, *99*, 14652–14657.

## 594 **Supplementary Methods**

### 595 **Large Scale expression and purification protocol for MK14**

596 Large scale expression of MK14 was performed at the QB3 MacroLab (QB3 MacroLab, University of California,  
597 Berkeley, CA 94720 [<http://qb3.berkeley.edu/macrolab/>], a core facility offering automated gene cloning and  
598 recombinant protein expression and purification services.

599 Rosetta2(DE3)pLysS cells (Novagen) were used to co-express MK14 (same plasmid as from the high-  
600 throughput kinase expression panel) and 13SA Lamda phosphatase. The cells were grown in 2YT Medium  
601 (16 g/L Tryptone, 10 g/L Yeast Extract, 5 g/L NaCl) to OD600 of 0.5 at 37°C. The culture was cooled to 16°C and  
602 induced with 0.5 mM IPTG overnight. The cultures were pelleted at 5000 rpm for 30 min and resuspended  
603 in 20 mL Nickel buffer A (25 mM HEPES pH 7.5, 10% glycerol, 400mM NaCl, 20 mM imidazole, 5 mM BME)  
604 with the following protease inhibitors: 1  $\mu$ g/mL leupeptin, 1  $\mu$ g/mL pepstatin, and 0.5 mM PMSF). The  
605 resuspended cells were frozen at -80°C.

606 When ready for purification, the cells were thawed and ruptured using a homogenizer (Avestin C3,  
607 15000psi, 3 passes). The broken cells were pelleted at 15000 rpm for 30 min (SS34 rotor). Clarified lysate was  
608 loaded onto a 5 mL HisTrap FF Crude column (GE Healthcare) and washed with Nickel buffer A to remove  
609 any unbound material. The protein was eluted with Nickel buffer B (25 mM HEPES pH 7.5, 10% glycerol,  
610 400mM NaCl, 400 mM imidazole, 5 mM BME) and pooled for buffer exchange into Nickel buffer A on a HiPrep  
611 26/10 Desalting Column (GE Healthcare). Rough protein yields were quantified using theoretical extinction  
612 coefficients calculated using ProtParam (<http://ca.expasy.org/tools/protparam.html>). The His tag was cleaved  
613 off of MK14 by incubation with TEV protease (25°C, 2 hours, 1:20 mass ratio).

614 After tag cleavage, the sample was run over a 5 mL HisTrap FF Crude column (GE Healthcare) with Nickel  
615 buffer A. The flow-through was collected, concentrated to roughly 5mL using centrifugal concentrators  
616 (10 kDA MWCO, Millipore) and loaded onto a HiPrep 16/60 Sephacryl S-200 HR column (GE Healthcare). The  
617 sample was equilibrated into Gel Filtration buffer (20 mM Tris-HCl pH 8.0, 150 mM NaCl, 5% glycerol, 1 mM  
618 DTT) and fractions containing MK14 were pooled and concentrated (10 kDA MWCO centrifugal concentrators,  
619 Millipore). 500  $\mu$ L aliquots of MK14 were snap frozen in liquid nitrogen and stored at -80°C. Quantification  
620 by theoretical extinction coefficient suggests the final MK14 concentration was roughly 4.0 mg/mL (97  $\mu$ M),  
621 roughly 22.4 mg/L of culture yield.
